# Supplementary material for: Boosting ppb-level triethylamine sensing of ZnO: adjusting proportions of electron donor defects
Source: Royal Society of Chemistry journal article supplement (doi:10.1039/d0tc01022g), 2020-01-01
Supplement: d0tc01022g1.pdf [file d0tc01022g1.pdf]

## Supplementary Information

### **Boosting ppb-level tiethylamine sensing of ZnO: adjusting proportions of electron donor defects**

Wenjing Wei<sup>a#</sup>, Jingxiang Zhao<sup>a#</sup>, Shaoxuan Shi<sup>a#</sup>, Huiming Lin<sup>a</sup>, Zhu Mao<sup>b</sup>, Feng  
Zhang<sup>a\*</sup> and Fengyu Qu<sup>a\*</sup>

*a. Key Laboratory of Photochemical Biomaterials and Energy Storage Materials,  
Heilongjiang Province and College of Chemistry and Chemical Engineering, Harbin  
Normal University, Harbin 150025, P. R. China*

*b. School of Chemistry and Life Science, Advanced Institute of Materials Science,  
Changchun University of Technology, Changchun 130012, China*

# These authors contributed equally to this work

\*Corresponding authors: Feng Zhang (E-mail: zhangfeng@hrbnu.edu.cn) and  
Fengyu Qu (E-mail: qufengyu@hrbnu.edu.cn)

---

**Mott–Schottky (M-S) curves and electrochemical impedance spectroscopy (EIS):**

The ZnO, saturated calomel electrode (SCE) and Pt wire was used as working electrode, reference electrode and pair electrode, respectively, detected in 0.1 M Na<sub>2</sub>SO<sub>4</sub>. ZnO was evenly mixed with ethanol, and then the paste was dropped on tin fluoride oxide (FTO) glass (1.0×1.0 cm<sup>2</sup>), and dried at 60 °C. M-S curves were measured voltages of -0.6v to 0.6v versus SCE at frequencies of 100 Hz, 500 Hz, 1000 Hz at room temperature, respectively. EIS was carried out using a frequency range from 1000000 to 0.1 Hz at room temperature.

---

**Theoretical model and calculations:** The DMol<sup>3</sup> module was used to perform all spin-polarized DFT simulations<sup>[1]</sup>, and the exchange-correlation interactions were treated using the Perdew-Burke-Ernzerhof (PBE) functional within a generalized gradient approximation (GGA)<sup>[2]</sup>. For the possible van der Waals interactions, the Grimme (DFT-D2) scheme was employed in all calculations<sup>[3]</sup>. For the involved Zn atoms in these catalysts, the density functional semi-core pseudopotential (DSPP) was adopted to treat their core electrons<sup>[4]</sup>, whereas the double numerical plus polarization (DNP) basis set was employed for other elements. Self-consistent field (SCF) calculations were carried out with a convergence criterion of 10<sup>-6</sup> a.u. on the total energy. The hybrid functionals based on the Heyd–Scuseria–Ernzerhof (HSE06) method<sup>[5]</sup> were adopted to get the exact band structures of the pristine and defective ZnO materials.

To simulate the O<sub>2</sub> adsorption, ZnO(100) was used, which has a four layer structure. The Brillouin zone was sampled using a 5 × 5 × 1 k-points for the geometry optimization. The adsorption energy ( $E_{\text{ads}}$ ) of O<sub>2</sub> molecule on substrate can be determined according to the following definition:  $E_{\text{ads}} = E_{\text{total}}(\text{adsorbed systems}) - E_{\text{total}}(\text{adsorbate}) - E_{\text{total}}(\text{substrate})$ , where  $E_{\text{total}}$ , represent the total energies for the systems in the bracket.

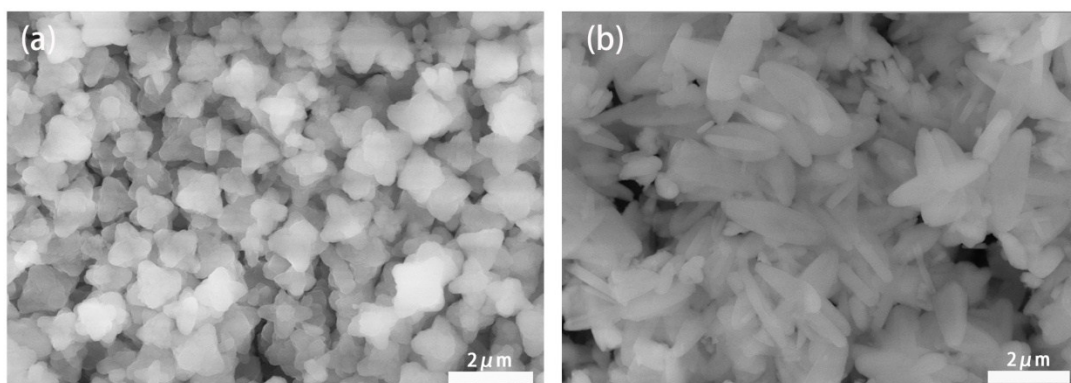

**Fig. S1** SEM images of ZIF-II (a) and ZIF-IV (b)

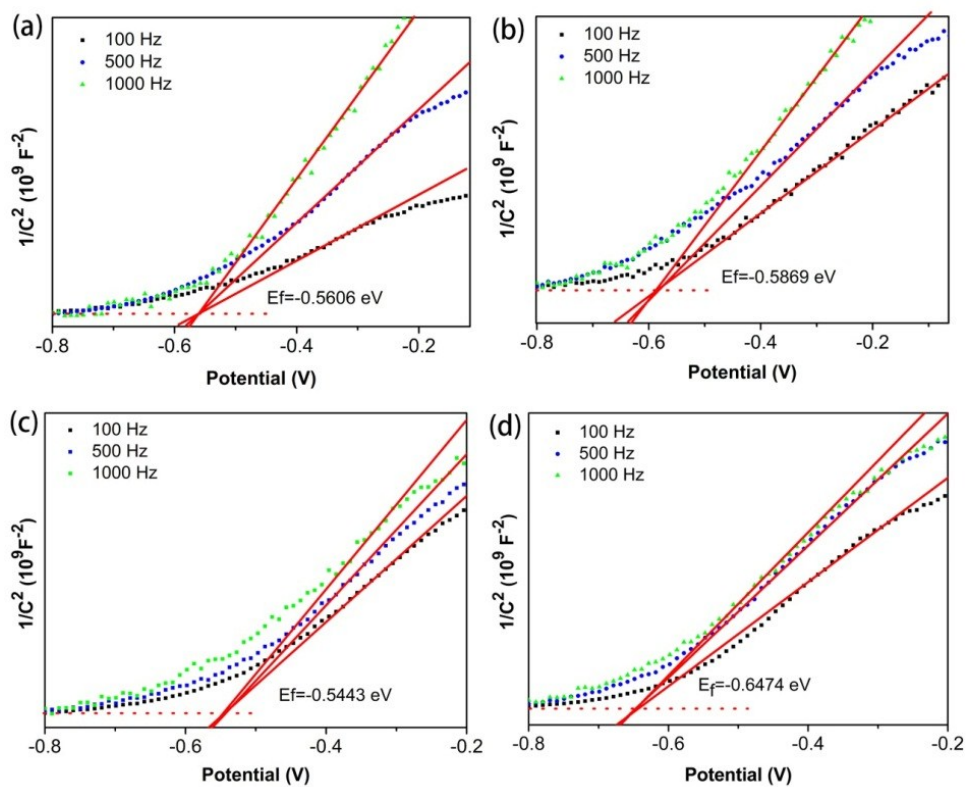

**Fig. S2** Mott-Schottly plots of ZnO-X ((a) I, (b) II, (c) III and (d) IV) at 100 Hz, 500 Hz, 1000 Hz, respectively.

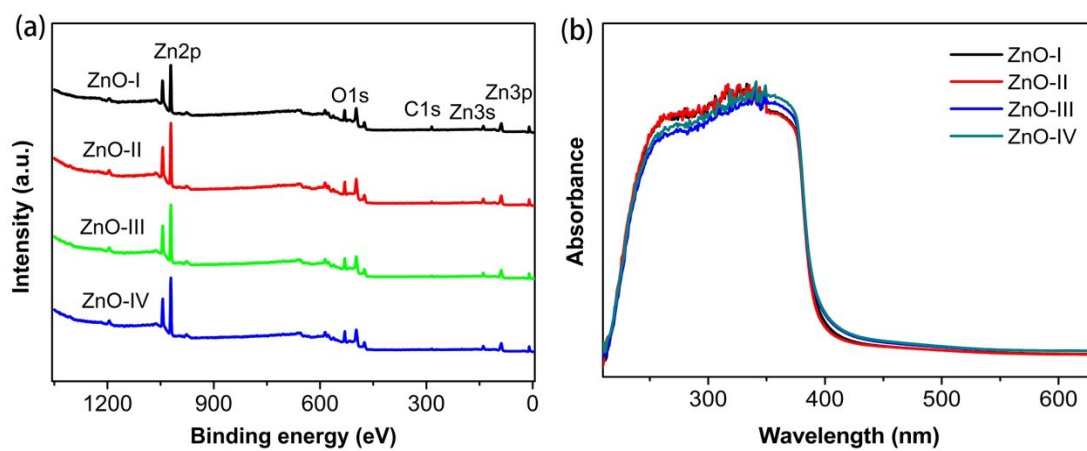

**Fig. S3** (a) XPS survey and (b) UV-vis diffuse reflectance spectra of ZnO-X (I, II, III, IV).

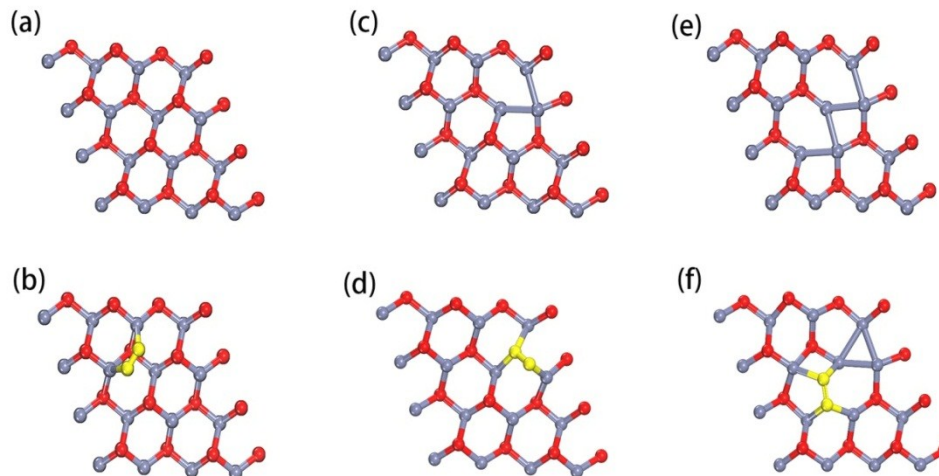

**Fig. S4** The (100) surface of ZnO with 0% (a, b), 12.5% (c, d) and 25 % (e, f) oxygen vacancies before (a, c, e) and after (b, d, f) adsorption of oxygen. The red, blue and yellow balls represent O, N and adsorbed O atoms, respectively.

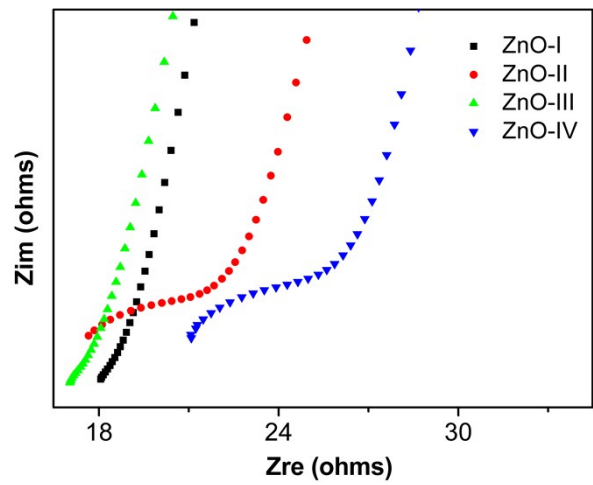

**Fig. S5** Nyquist impedance plot of ZnOs (I, II, III and IV).

**Table S1** The sensing performances of various materials based TEA sensors.

| Material                              | Concentration (ppm) | Sensitivity | Operating temperature (°C) | detection limit (ppm) | Ref.      |
|---------------------------------------|---------------------|-------------|----------------------------|-----------------------|-----------|
| Pd/In <sub>2</sub> O <sub>3</sub>     | 50                  | 47.56       | 220                        | 1                     | [6]       |
| SnO <sub>2</sub> /ZnO                 | 50                  | 17.7        | 200                        | 10                    | [7]       |
| WO <sub>3</sub> hollow microspheres   | 50                  | 16          | 220                        | 5                     | [8]       |
| ZnO/ZnCo <sub>2</sub> O <sub>4</sub>  | 100                 | 5.12        | 220                        | 5                     | [9]       |
| Zn <sub>2</sub> SnO <sub>4</sub> /ZnO | 100                 | 175.5       | 200                        | 0.4                   | [10]      |
| Ag/SnO <sub>2</sub> /rGO              | 100                 | 82.47       | 220                        | 0.5                   | [11]      |
| SnO <sub>2</sub> hollow microfiber    | 100                 | 49.5        | 270                        | 2                     | [12]      |
| CuO particles                         | 100                 | 102         | 230                        | 5                     | [13]      |
| Cr/ $\alpha$ -MoO <sub>3</sub>        | 100                 | 150.25      | 200                        | 1                     | [14]      |
| ZnO                                   | 50                  | 773         | 275                        | 0.2                   | This work |
|                                       | 100                 | 1133.5      |                            |                       |           |

**Table S2** The BET surface area, atomic proportion and band-gap width of ZnO-X.

|                                                    | ZnO-I | ZnO-II | ZnO-III | ZnO-IV |
|----------------------------------------------------|-------|--------|---------|--------|
| BET surface area (m <sup>2</sup> g <sup>-1</sup> ) | 8.98  | 3.79   | 5.25    | 2.7685 |
| O <sub>s</sub> /O atomic (%)                       | 26.03 | 22.43  | 28.44   | 24.39  |
| band-gap width (eV)                                | 3.178 | 3.190  | 3.161   | 3.195  |

**Table S3** Related electrochemical parameters.

|                                   | ZnO-I                | ZnO-II               | ZnO-III              | ZnO-IV               |
|-----------------------------------|----------------------|----------------------|----------------------|----------------------|
| 500 Hz $N_D$ ( $\text{cm}^{-3}$ ) | $5.7 \times 10^{21}$ | $5.4 \times 10^{21}$ | $5.8 \times 10^{21}$ | $3.3 \times 10^{21}$ |
| $E_{CB}$ (eV) vs SCE              | -0.5606              | -0.5869              | -0.5443              | -0.6474              |
| $E_{VB}$ (eV) vs SCE              | -3.7386              | -3.7769              | -3.7053              | -3.8424              |

**Table S4** The relative intensity  $I(E_1(\text{LO}))/I(E_2(\text{high}))$  of  $E_1(\text{LO})$  to  $E_2(\text{high})$  mode.

|                                         | ZnO-I   | ZnO-II  | ZnO-III | ZnO-IV |
|-----------------------------------------|---------|---------|---------|--------|
| $I(E_1(\text{LO}))$                     | 265.73  | 350.48  | 404.65  | 48.41  |
| $I(E_2(\text{high}))$                   | 1543.31 | 1557.86 | 1555.48 | 1223   |
| $I(E_1(\text{LO}))/I(E_2(\text{high}))$ | 0.17    | 0.23    | 0.26    | 0.0396 |

**Table S5** Theoretical calculation of relevant parameter.

|                     | ZnO-I (0%) | ZnO-II (12.5%) | ZnO-III (25%) |
|---------------------|------------|----------------|---------------|
| Binding energy (eV) | 0.14       | 1.70           | 2.39          |
| Band-gap width (eV) | 2.54       | 2.67           | 2.37          |



---

## Reference

- [1] a) B. Delley, *The Journal of Chemical Physics* **2000**, *113*, 7756-7764; b) B. Delley, *The Journal of Chemical Physics* **1990**, *92*, 508-517.
- [2] J. P. Perdew, K. Burke and M. Ernzerhof, *Physical Review Letters* **1997**, *78*, 1396-1396.
- [3] S. Grimme, *Journal of Computational Chemistry* **2006**, *27*, 1787-1799.
- [4] B. Delley, *Physical Review B* **2002**, *66*, 155125.
- [5] J. Heyd, G. E. Scuseria and M. Ernzerhof, *The Journal of Chemical Physics* **2003**, *118*, 8207-8215.
- [6] X. Liu, K. Zhao, X. Sun, C. Zhang, X. Duan, P. Hou, G. Zhao, S. Zhang, H. Yang, R. Cao and X. Xu, *Sensors and Actuators B: Chemical* **2019**, *285*, 1-10.
- [7] Q. Ma, S. Chu, Y. Liu, Y. Chen, J. Song, H. Li, J. Wang, Q. Che, G. Wang and Y. Fang, *Materials Letters* **2019**, *236*, 452-455.
- [8] C. Zhai, M. Zhu, L. Jiang, T. Yang, Q. Zhao, Y. Luo and M. Zhang, *Applied Surface Science* **2019**, *463*, 1078-1084.
- [9] Y. Li, N. Luo, G. Sun, B. Zhang, H. Jin, L. Lin, H. Bala, J. Cao, Z. Zhang and Y. Wang, *Sensors and Actuators B: Chemical* **2019**, *287*, 199-208.
- [10] F. Liu, X. Chen, X. Wang, Y. Han, X. Song, J. Tian, X. He and H. Cui, *Sensors and Actuators B: Chemical* **2019**, *291*, 155-163.
- [11] S. Zhang, B. Zhang, G. Sun, Y. Li, B. Zhang, Y. Wang, J. Cao and Z. Zhang, *Materials Research Bulletin* **2019**, *114*, 61-67.
- [12] Y. Zou, S. Chen, J. Sun, J. Liu, Y. Che, X. Liu, J. Zhang and D. Yang, *ACS Sensors* **2017**, *2*, 897-902.
- [13] Y.P. Wu, W. Zhou, W.W. Dong, J. Zhao, X.Q. Qiao, D.F. Hou, D.S. Li, Q. Zhang and P. Feng, *Crystal Growth & Design* **2017**, *17*, 2158-2165.
- [14] W. Li, S. He, L. Feng and W. Yang, *Materials Letters* **2019**, *250*, 143-146.
